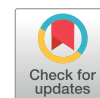

# Issues and Events

## STANDARDS OF MEDICAL CARE IN DIABETES—2022

American Diabetes Association's "Standards of Medical Care in Diabetes" is based on a complete review of the relevant literature by a diverse group of highly trained clinicians and researchers. After weighing the quality of evidence, from rigorous double-blind clinical trials to expert opinion, recommendations are drafted, reviewed, and submitted for approval to the American Diabetes Association Executive Committee. Access the 2022 Standards of Care at [diabetesjournals.org/care/issue/45/Supplement\\_1](https://diabetesjournals.org/care/issue/45/Supplement_1).

## 82nd SCIENTIFIC SESSIONS SUBMISSIONS

The American Diabetes Association's Scientific Sessions Planning Committee is soliciting noteworthy session proposals for the 82nd Scientific Sessions, which will be held 3–7 June 2022 at the Ernest N. Morial Convention Center in New Orleans, LA. The committee encourages submissions that are innovative, challenge current treatment paradigms, and represent the latest advances in basic, clinical, and translational science. The submission deadline is 10 January 2022. Please visit [professional.diabetes.org/scientific-sessions](https://professional.diabetes.org/scientific-sessions) for further information.

## 2022 CLINICAL UPDATE COURSE

The 2022 Clinical Update Course will be held in Tampa, FL, as well as virtually, on 4–6 February 2022. The program will focus on clinical practice updates including information regarding the 2022 Standards of Medical Care in Diabetes and the 2022 National Standards for Diabetes Self-Management Education and Support. Approximately 15 continuing education credits will be available to registered attendees. For more information, please visit [professional.diabetes.org/meeting/local-continuing-education-activities/2022-clinical-update-course](https://professional.diabetes.org/meeting/local-continuing-education-activities/2022-clinical-update-course).

## 36th ANNUAL CLINICAL CONFERENCE ON DIABETES

The 36th Annual Clinical Conference on Diabetes will be held in Ponte Vedra Beach, Florida, on 26–29 May 2022 at the Sawgrass Marriott Golf Resort & Spa. The ADA Clinical Conference is designed specifically for primary

care physicians, physician associates, nurse practitioners, pharmacists, nurses, psychologists, dietitians, certified diabetes educators, and other health care professionals who care for patients with diabetes or those at risk for diabetes and who manage diabetes-related complications. For registration details and more information, please visit [professional.diabetes.org/meeting/other/36th-annual-clinical-conference-diabetes](https://professional.diabetes.org/meeting/other/36th-annual-clinical-conference-diabetes).

## COMPENDIUM: CHRONIC KIDNEY DISEASE AND TYPE 2 DIABETES

ADA's most recently published clinical compendium discusses diabetic kidney disease, mechanisms underlying progression to diabetic vascular disease, and opportunities to improve clinical outcomes. This monograph is supported by unrestricted education grants from AstraZeneca and Bayer. To access this and other clinical compendia for free, visit [professional.diabetes.org/monographs](https://professional.diabetes.org/monographs).

## "DIABETES AND COVID-19" SPECIAL ARTICLE COLLECTIONS

These online collections of articles feature the latest studies, clinical observations, and commentary published in *Diabetes Care* and *Diabetes* on COVID-19 and diabetes. Topics include management of diabetes and its complications during the pandemic, blood glucose control and remote glucose monitoring, and outcomes in patients with hyperglycemia, cardiovascular risk, and obesity. The special article collections are updated regularly as relevant articles are published online. To access the *Diabetes Care* collection, visit [care.diabetesjournals.org/collection/diabetes-and-COVID19](https://care.diabetesjournals.org/collection/diabetes-and-COVID19). For the *Diabetes* collection, visit [diabetes.diabetesjournals.org/collection/diabetes-and-COVID19-articles](https://diabetes.diabetesjournals.org/collection/diabetes-and-COVID19-articles).

## DIABETES CORE UPDATE PODCASTS

*Diabetes Core Update* is a monthly audio podcast devoted to presenting and discussing the latest clinically relevant articles from the American Diabetes Association's scholarly journals. *Diabetes Core Update* audio podcasts are free and can be accessed through iTunes or RSS feed. For more information, please visit [diabetesjournals.org/content/diabetes-core-update-podcasts](https://diabetesjournals.org/content/diabetes-core-update-podcasts).

**Diabetes** (print ISSN 0012-1797, online ISSN 1939-327X) is owned, controlled, and published monthly by the American Diabetes Association, Inc., 2451 Crystal Drive, Suite 900, Arlington, VA 22202. *Diabetes* is a registered trademark of the American Diabetes Association. **Periodicals postage** paid at Arlington, VA, and additional mailing offices. **POSTMASTER:** Send all UAA to CFS (see DMM 507.1.5.2). **NON-POSTAL AND MILITARY FACILITIES:** Send address corrections to American Diabetes Association, Membership & Publication Operations, PO Box 37433, Boone, IA 50037-0433. Claims for missing issues should be made within 6 months of publication. The publisher expects to supply missing issues free of charge only when losses have been sustained in transit and when the reserve stock permits.
